# Supplementary material
Source: PubMed Central journal article supplement (PMC4256784)
Supplement: 12bf38abfac20df0e553a9bbf67daff7_genetics.114.170746-2.pdf [file 12bf38abfac20df0e553a9bbf67daff7_genetics.114.170746-2.pdf]

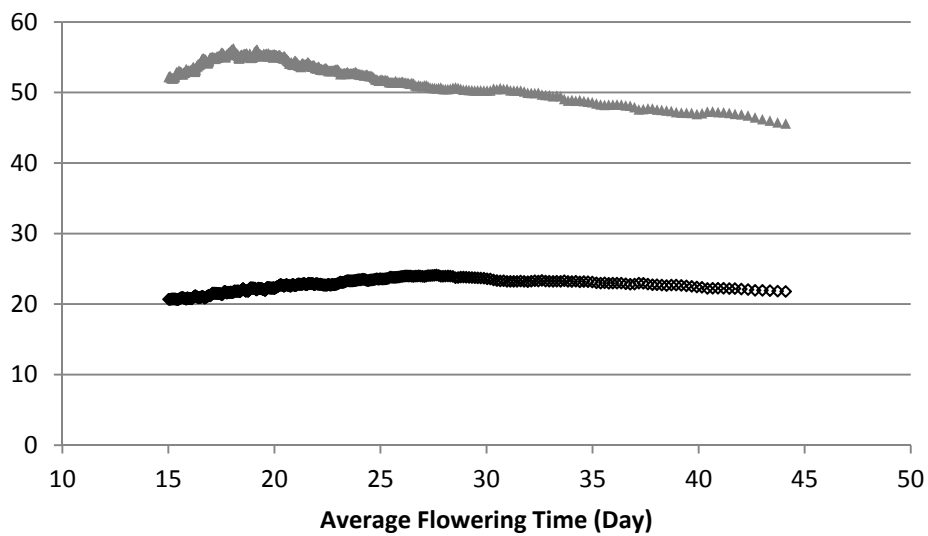

**Figure S1** Changes in average of seed weight and seed number across flowering time. Average seed weight and seed number were calculated for 100 lines in a sliding window across increasing flowering time. The open black diamonds represent the seed weight averages in  $\mu\text{g}$ , and the grey triangles represent the average seed number/fruit for each window; plotted against the average flowering time for the same window.
