# Supplementary material
Source: PubMed Central journal article supplement (PMC4256784)
Supplement: 32a37ddf985a9bceae579ec95c3091d9_genetics.114.170746-1.pdf [file 32a37ddf985a9bceae579ec95c3091d9_genetics.114.170746-1.pdf]

**Table S1 Significant QTLs detected for total number of healthy seeds per fruit.** “Chr.”

indicates the chromosome location, and “Peak (Kb)” the position in the chromosome of the QTL peak in kilobases. Statistical significance of each QTL is indicated by LogP and Genome wide P.  $r^2$  indicates the amount of variation explained by the QTL. Positions highlighted in bolt are the same as when QTL for total seed number was mapped (see Table 1 in the main text).

| Chr. | Peak (kb)     | -logP    | Genome-wide P | $r^2$ |
|------|---------------|----------|---------------|-------|
| 1    | <b>20,175</b> | 4.691553 | 0.006         | 0.06  |
| 1    | <b>24,795</b> | 4.287234 | 0.01          | 0.04  |
| 3    | <b>15,233</b> | 4.885016 | 0.005         | 0.05  |
| 3    | <b>18,512</b> | 4.951098 | 0.004         | 0.07  |
| 4    | <b>269</b>    | 5.615617 | 0.002         | 0.09  |
| 4    | 2,588         | 4.288144 | 0.01          | 0.03  |
| 4    | <b>5,290</b>  | 4.408708 | 0.009         | 0.06  |
| 4    | <b>7,177</b>  | 5.41221  | 0.002         | 0.07  |
| 4    | 9,198         | 3.70522  | 0.032         | 0.02  |
| 4    | 13,180        | 3.822907 | 0.026         | 0.03  |
| 4    | 14,787        | 3.556139 | 0.043         | 0.03  |
| 5    | 3,696         | 3.497428 | 0.048         | 0.03  |
| 5    | <b>16,446</b> | 3.918824 | 0.024         | 0.03  |
| 5    | <b>21,039</b> | 5.1142   | 0.003         | 0.08  |

**Table S2 Significant QTLs detected for fruit length when the 39 lines with the erecta phenotype were removed from the analysis.** “Chr” indicates the chromosome location, and “Peak Kb” the position in the chromosome of the QTL peak. Significance of QTL is indicated by LogP and Genome wide P.  $r^2$  indicates the amount of variation explained by the QTL.

| Chr. | Peak bp  | Marker          | -logP | Genome-wide P | $r^2$ |
|------|----------|-----------------|-------|---------------|-------|
| 1    | 9516363  | MASC00393       | 3.95  | 0.02          | 0.04  |
| 1    | 16874541 | MN1_16874540    | 4.07  | 0.02          | 0.02  |
| 2    | 16893586 | MASC06022       | 3.80  | 0.03          | 0.06  |
| 5    | 16446291 | NMSNP5_16446291 | 7.22  | 0.00          | 0.04  |
| 5    | 23815655 | MN5_23815654    | 3.88  | 0.03          | 0.05  |

**Table S3 The estimated values of 19 parent alleles on fruit length (mm) for each significant QTL detected by QTL mapping.** Alleles having the largest effect in increasing and decreasing the trait are underlined and bolded, respectively.

| Chr. | Marker          | Parental accession |       |       |             |             |             |      |             |      |      |      |      |        |             |       |       |      |      |             |
|------|-----------------|--------------------|-------|-------|-------------|-------------|-------------|------|-------------|------|------|------|------|--------|-------------|-------|-------|------|------|-------------|
|      |                 | Bur-0              | Can-0 | Col-0 | Ct-1        | Edi-0       | Hi-0        | Kn-0 | Ler-0       | Mt-0 | No-0 | Oy-0 | Po-0 | Rsch-4 | Sf-2        | Tsu-0 | Wil-2 | Ws-0 | Wu-0 | Zu-0        |
| 1    | MASC00393       | 14.8               | 15.6  | 15.3  | <u>15.7</u> | <b>14.3</b> | 15          | 14.9 | 15.3        | 15.1 | 15.4 | 15.2 | 15.3 | 15.6   | 15.2        | 15    | 15.1  | 15.3 | 14.5 | 15.6        |
|      | MN1_16874540    | 15                 | 15.2  | 14.9  | <u>15.8</u> | 14.8        | 15.2        | 15.1 | 15.1        | 15   | 15   | 15.1 | 15.3 | 15.5   | <b>14.8</b> | 15    | 15    | 15   | 15.1 | 15.4        |
| 2    | MASC06022       | 15.3               | 14.9  | 15.3  | 15          | 15.1        | <u>16.5</u> | 15.4 | 14.7        | 15.2 | 15.2 | 15.4 | 15.8 | 14.8   | 14.9        | 14.8  | 15.1  | 15.1 | 14.8 | <b>14.6</b> |
| 5    | NMSNP5_14661352 | 14.9               | 15    | 15.6  | 15.1        | <b>14.4</b> | 14.9        | 14.9 | <u>15.7</u> | 15.1 | 15.6 | 15.1 | 14.9 | 15.6   | 14.5        | 15.7  | 14.9  | 14.8 | 15.1 | 15.4        |
|      | NMSNP5_16446291 | 14.7               | 15.4  | 15.4  | 15.2        | 14.9        | 14.9        | 14.9 | <u>15.9</u> | 15.2 | 15.1 | 15.1 | 15.2 | 15.6   | <b>14.6</b> | 15.6  | 14.6  | 14.7 | 15   | 15.1        |
|      | MN5_23815654    | <b>14.2</b>        | 15.2  | 15.3  | <u>15.9</u> | 15.3        | 15          | 15.1 | 15.3        | 15.2 | 14.9 | 15.2 | 15.2 | 15.5   | 14.3        | 15.8  | 14.8  | 15   | 15   | 15.3        |

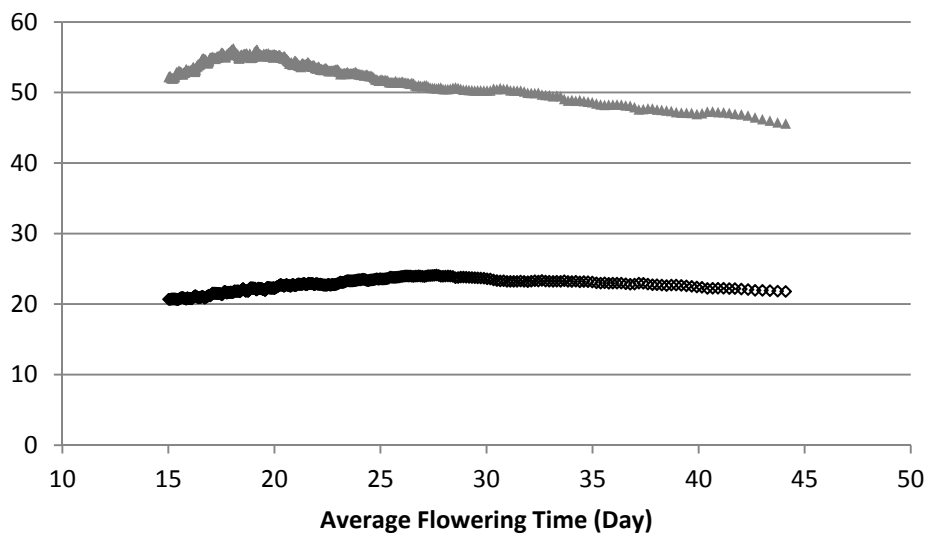

**Figure S1** Changes in average of seed weight and seed number across flowering time. Average seed weight and seed number were calculated for 100 lines in a sliding window across increasing flowering time. The open black diamonds represent the seed weight averages in  $\mu\text{g}$ , and the grey triangles represent the average seed number/fruit for each window; plotted against the average flowering time for the same window.

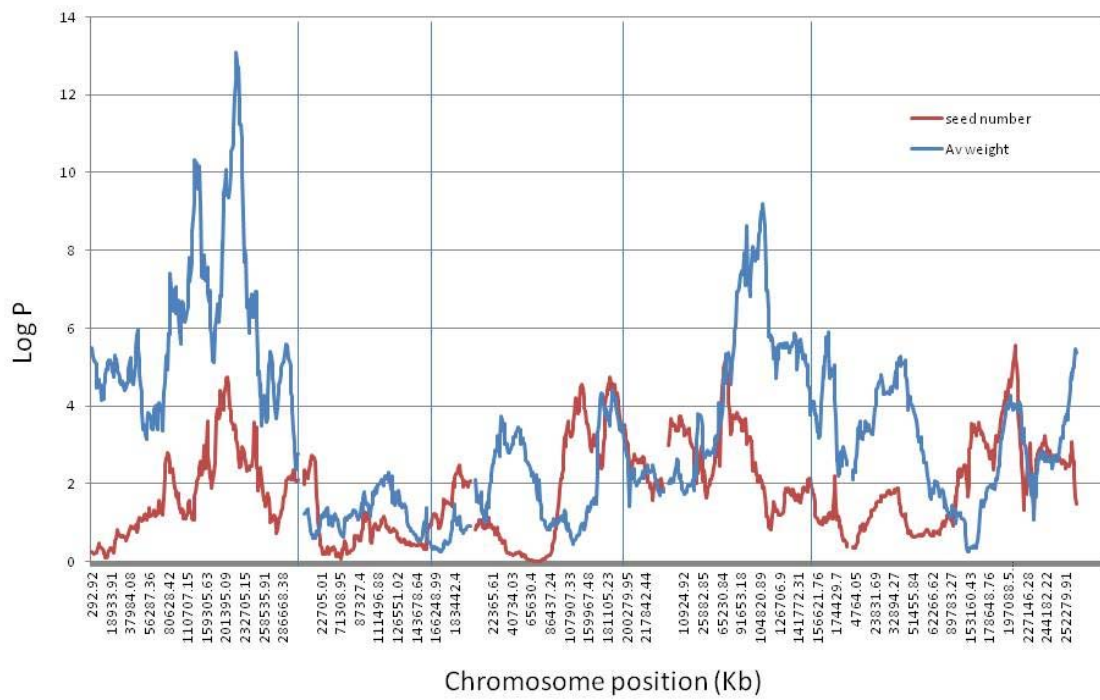

**Figure S2** QTL scan for seed number per fruit (red) and seed weight (blue) for MAGIC lines ( $-\text{Log}P$  of 3.51 corresponds to a genome-wide  $p$ -value  $< 0.05$ ).

## Files S1-S2

Available for download as Excel files at  
<http://www.genetics.org/lookup/suppl/doi:10.1534/genetics.114.170746/-/DC1>

**File S1** Genotypes for all MAGIC lines

**File S2** All phenotypic data
