# Supplementary material
Source: PubMed Central journal article supplement (PMC4256784)
Supplement: 1659d35f599143954ae3ba057a4bf1a0_genetics.114.170746-4.pdf [file 1659d35f599143954ae3ba057a4bf1a0_genetics.114.170746-4.pdf]

**Table S3 The estimated values of 19 parent alleles on fruit length (mm) for each significant QTL detected by QTL mapping.** Alleles having the largest effect in increasing and decreasing the trait are underlined and bolded, respectively.

| Chr. | Marker          | Parental accession |       |       |             |             |             |      |             |      |      |      |      |        |             |       |       |      |      |             |
|------|-----------------|--------------------|-------|-------|-------------|-------------|-------------|------|-------------|------|------|------|------|--------|-------------|-------|-------|------|------|-------------|
|      |                 | Bur-0              | Can-0 | Col-0 | Ct-1        | Edi-0       | Hi-0        | Kn-0 | Ler-0       | Mt-0 | No-0 | Oy-0 | Po-0 | Rsch-4 | Sf-2        | Tsu-0 | Wil-2 | Ws-0 | Wu-0 | Zu-0        |
| 1    | MASC00393       | 14.8               | 15.6  | 15.3  | <u>15.7</u> | <b>14.3</b> | 15          | 14.9 | 15.3        | 15.1 | 15.4 | 15.2 | 15.3 | 15.6   | 15.2        | 15    | 15.1  | 15.3 | 14.5 | 15.6        |
|      | MN1_16874540    | 15                 | 15.2  | 14.9  | <u>15.8</u> | 14.8        | 15.2        | 15.1 | 15.1        | 15   | 15   | 15.1 | 15.3 | 15.5   | <b>14.8</b> | 15    | 15    | 15   | 15.1 | 15.4        |
| 2    | MASC06022       | 15.3               | 14.9  | 15.3  | 15          | 15.1        | <u>16.5</u> | 15.4 | 14.7        | 15.2 | 15.2 | 15.4 | 15.8 | 14.8   | 14.9        | 14.8  | 15.1  | 15.1 | 14.8 | <b>14.6</b> |
| 5    | NMSNP5_14661352 | 14.9               | 15    | 15.6  | 15.1        | <b>14.4</b> | 14.9        | 14.9 | <u>15.7</u> | 15.1 | 15.6 | 15.1 | 14.9 | 15.6   | 14.5        | 15.7  | 14.9  | 14.8 | 15.1 | 15.4        |
|      | NMSNP5_16446291 | 14.7               | 15.4  | 15.4  | 15.2        | 14.9        | 14.9        | 14.9 | <u>15.9</u> | 15.2 | 15.1 | 15.1 | 15.2 | 15.6   | <b>14.6</b> | 15.6  | 14.6  | 14.7 | 15   | 15.1        |
|      | MN5_23815654    | <b>14.2</b>        | 15.2  | 15.3  | <u>15.9</u> | 15.3        | 15          | 15.1 | 15.3        | 15.2 | 14.9 | 15.2 | 15.2 | 15.5   | 14.3        | 15.8  | 14.8  | 15   | 15   | 15.3        |
