# Supplementary material
Source: PubMed Central journal article supplement (PMC4256784)
Supplement: 4194df3ad4389fa8b6356ca262dee9e1_genetics.114.170746-7.pdf [file 4194df3ad4389fa8b6356ca262dee9e1_genetics.114.170746-7.pdf]

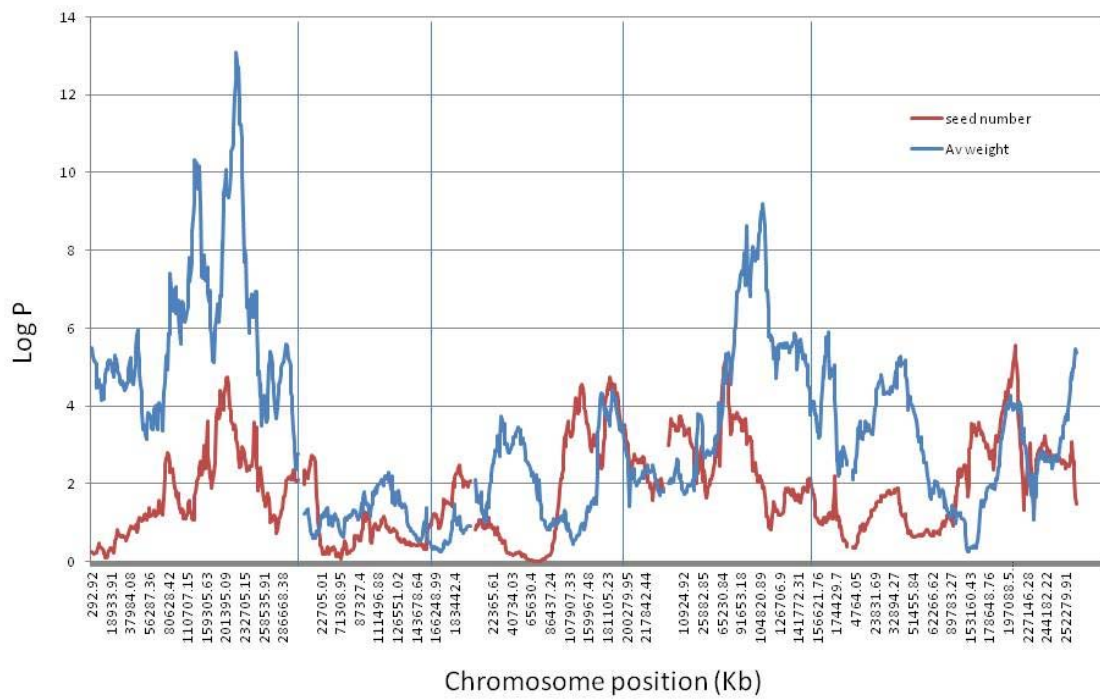

**Figure S2** QTL scan for seed number per fruit (red) and seed weight (blue) for MAGIC lines ( $-\text{Log}P$  of 3.51 corresponds to a genome-wide  $p$ -value  $< 0.05$ ).
