# Supplementary material
Source: PubMed Central journal article supplement (PMC4256784)
Supplement: 697940e5248db9c64912fa079a4db623_genetics.114.170746-5.pdf [file 697940e5248db9c64912fa079a4db623_genetics.114.170746-5.pdf]

**Table S2 Significant QTLs detected for fruit length when the 39 lines with the erecta phenotype were removed from the analysis.** “Chr” indicates the chromosome location, and “Peak Kb” the position in the chromosome of the QTL peak. Significance of QTL is indicated by LogP and Genome wide P.  $r^2$  indicates the amount of variation explained by the QTL.

| Chr. | Peak bp  | Marker          | -logP | Genome-wide P | $r^2$ |
|------|----------|-----------------|-------|---------------|-------|
| 1    | 9516363  | MASC00393       | 3.95  | 0.02          | 0.04  |
| 1    | 16874541 | MN1_16874540    | 4.07  | 0.02          | 0.02  |
| 2    | 16893586 | MASC06022       | 3.80  | 0.03          | 0.06  |
| 5    | 16446291 | NMSNP5_16446291 | 7.22  | 0.00          | 0.04  |
| 5    | 23815655 | MN5_23815654    | 3.88  | 0.03          | 0.05  |
