# Supplementary material
Source: PubMed Central journal article supplement (PMC4256784)
Supplement: 150030369630775bfb4632cc498be5a7_genetics.114.170746-8.pdf [file 150030369630775bfb4632cc498be5a7_genetics.114.170746-8.pdf]

**Table S1 Significant QTLs detected for total number of healthy seeds per fruit.** “Chr.”

indicates the chromosome location, and “Peak (Kb)” the position in the chromosome of the QTL peak in kilobases. Statistical significance of each QTL is indicated by LogP and Genome wide P.  $r^2$  indicates the amount of variation explained by the QTL. Positions highlighted in bolt are the same as when QTL for total seed number was mapped (see Table 1 in the main text).

| Chr. | Peak (kb)     | -logP    | Genome-wide P | $r^2$ |
|------|---------------|----------|---------------|-------|
| 1    | <b>20,175</b> | 4.691553 | 0.006         | 0.06  |
| 1    | <b>24,795</b> | 4.287234 | 0.01          | 0.04  |
| 3    | <b>15,233</b> | 4.885016 | 0.005         | 0.05  |
| 3    | <b>18,512</b> | 4.951098 | 0.004         | 0.07  |
| 4    | <b>269</b>    | 5.615617 | 0.002         | 0.09  |
| 4    | 2,588         | 4.288144 | 0.01          | 0.03  |
| 4    | <b>5,290</b>  | 4.408708 | 0.009         | 0.06  |
| 4    | <b>7,177</b>  | 5.41221  | 0.002         | 0.07  |
| 4    | 9,198         | 3.70522  | 0.032         | 0.02  |
| 4    | 13,180        | 3.822907 | 0.026         | 0.03  |
| 4    | 14,787        | 3.556139 | 0.043         | 0.03  |
| 5    | 3,696         | 3.497428 | 0.048         | 0.03  |
| 5    | <b>16,446</b> | 3.918824 | 0.024         | 0.03  |
| 5    | <b>21,039</b> | 5.1142   | 0.003         | 0.08  |
